# Supplementary material for: Exploiting Differences in Heme Biosynthesis between Bacterial Species to Screen for Novel Antimicrobials
Source: MDPI journal article supplement (doi:10.3390/biom13101485), 2023-10-06
Supplement: s1 [file s1]

# Exploiting differences in heme biosynthesis between bacterial species to screen for novel antimicrobials

Supplemental Tables:

**Supplemental Table S1.** Primers used to generate and validate heme gene replacements for *Sa*-CPD-YFP

| Primer name                   | Sequence 5' to 3'                                                                    |
|-------------------------------|--------------------------------------------------------------------------------------|
| hemG_HRcas_F <sup>1</sup>     | TGCTGGTGCTCTTTACCCCGACTTTCTGGCGTGAATGATGGAGTAATAC TCCTAATTTTTGTTGACACTCTATC          |
| hemG_HRcas_R <sup>1</sup>     | GGAAATTTAAATAATTTTCTGACCGCGCATTTTTATTCTTTATGCTTAATCAAAGGGAAAAGTGTCCATATGC            |
| SA_hY_to_hG_F <sup>2</sup>    | TGCTGGTGCTCTTTACCCCGACTTTCTGGCGTGAATGATGGAGTAATACGTGactaaatcagtggtattataggagc        |
| SA_hY_to_hG_R <sup>2</sup>    | GGAAATTTAAATAATTTTCTGACCGCGCATTTTTATTCTTTATGCTtacaactctgcgattactcttcagc              |
| SA_hF_cas_F <sup>3</sup>      | TTCCACTGGTTCGACAACCCAGAAAGCACATTCGAAAAAGCGATAAGTTATGTCCTAATTTTTGTTGACACTCTATC        |
| SA_hF_cas_R <sup>3</sup>      | AGAAGCCGTCACGTGACGCTGCATCAGCGGATGCGGGAGTGCGGGTGAAGGAGTTAATCAAAGGGAAAAGTGTCCATATGC    |
| SA_hQ_to_hF_F <sup>4</sup>    | TCCACTGGTTCGACAACCCAGAAAGCACATTCGAAAAAGCGATAAGTTatgagtaagcagccgaacattag              |
| SA_hQ_to_hF_R <sup>4</sup>    | CCGTCACGTGACGCTGCATCAGCGGATGCGGGAGTGCGGGTGAAGGAGGttaagaaatcgcaaagaattgattgaattcg     |
| hemoF_3F <sup>5</sup>         | CATGGCGCAGATCTGTTTATGTCA                                                             |
| hemF_SahemQ_4_R <sup>5</sup>  | CTTTCTGGTTGTGCAACCAAGTGGAAATAACTGATCACGCCTTCAGCAATC                                  |
| hemF_SahemQ_5_F <sup>5</sup>  | CTGATGCAGCGTCAGTGACGGCTTCTCGGAAAACAGCTGCTGG                                          |
| hemoF_6R <sup>5</sup>         | ATCAGCCTGCAGTGCGAAAAGTG                                                              |
| SA_hHc_to_hH_F <sup>6</sup>   | CTTTTCCGCTACAATTATCAACAAGTTGAATCGATAAGAGGCGGTaatgactaaaaaatgggattattagttatggcttatgg  |
| SA_hHc_to_hH_R <sup>6</sup>   | CGCCGACGAGGCTCTTCGCGACGGCGCTCAGTTCTTTACCGCTCAGCTttaaataatagacttgattcatcaacaattgc     |
| H_primer3 <sup>7</sup>        | GACGTACCGGACGAACTGATCG                                                               |
| H_primer4 <sup>7</sup>        | CAACTTGTGATAATTGTAGCGGAAAAGTGAGGAAGAAGAACTAATTGCTGTGAGAG                             |
| H_primer5 <sup>7</sup>        | GCGAAGAGCCTCGTCGGCGGTTTTATCATCATCCGTGAATAATGC                                        |
| H_primer6 <sup>7</sup>        | CCACCAGCAGGCGGAGGATTATC                                                              |
| hemN_KO_R <sup>8</sup>        | CTCAGCACATTGATGGCGCTTTCTGTTTTCTACTTTGTAAACGAAGCGCCATTCACTATAAACAGCGAAAAAACCCCGCCCTGT |
| hemN_KO_F <sup>8</sup>        | CGAAACGGGCATCCGCCGTACGCCGTAGCCGCCAGAGACGCCATCGGAAGGAGTGAGCATAAACAAAAAACCCCGCTTCGGC   |
| MC4100_hemG_F <sup>9</sup>    | GATCCTGATTGCCAACATGCTG                                                               |
| MC4100_hemG_R <sup>9</sup>    | GTGTTTGCCGTTGTTCCGTGTC                                                               |
| SY1_F <sup>9</sup>            | GGATTAGAACAAGATATTGTTACAAATACGAC                                                     |
| SY1_R <sup>9</sup>            | GTCGTATTTGTAACAATATCTTGTCTAATCC                                                      |
| SY3_F <sup>9</sup>            | CGTATTAGTAACGACACCACATCAAGTG                                                         |
| SY4_F <sup>9</sup>            | CAGATAATGAATTAGTATCGATTGTACGTAGAG                                                    |
| SY2_F <sup>9</sup>            | AGAAGAGGCATTGCGAAGTCTG                                                               |
| Ec_hemF_SoF <sup>9</sup>      | GTCGGTTCCTTCGGTGCTGGTG                                                               |
| Ec_hemF_SoR <sup>9</sup>      | CTGAAACGCATTGCGCTGAACG                                                               |
| F_primer4_part_R <sup>9</sup> | AATAACTGATCACGCCTTCAGCAATC                                                           |
| F_primer5_part_F <sup>9</sup> | CGGAAAACAGCTGCTGGTAATCC                                                              |
| MC4100_hemH_F <sup>9</sup>    | CCTTTTTCTGATTGACCTCTCACAGC                                                           |
| MC4100_hemH_R <sup>9</sup>    | CTACCCAGGCACGCTGCACG                                                                 |
| H_primer4_part_R <sup>9</sup> | GAGGAAGAAGAACTAATTGCTGTGAG                                                           |

|                               |                          |
|-------------------------------|--------------------------|
| H_primer5_part_F <sup>9</sup> | GTTTTCATCATCCGTGAATAATGC |
| Ec_hemN_SoF <sup>9</sup>      | CCGTTCTGCTGATAACCCCTCCG  |
| Ec_hemN_SoR <sup>9</sup>      | CATCAGGCATCATGCTCAGATGC  |
| qPCR1_Ec_hemG_F <sup>10</sup> | TCTGATGAACTCGCAATGGC     |
| qPCR1_Ec_hemG_R <sup>10</sup> | TTTGCGCGTATCCGTTTCAC     |
| qPCR1_Ec_hemH_F <sup>10</sup> | ATGAACTGGCACGCATTCTG     |
| qPCR1_Ec_hemH_R <sup>10</sup> | TTGGCAAAAGAAGCGCGTAC     |
| qPCR1_Ec_hemF_F <sup>10</sup> | ATTTGACCGCTGTTTTGCC      |
| qPCR1_Ec_hemF_R <sup>10</sup> | TTTCCGTCGCTCGACAATTG     |
| qPCR1_Ec_hemN_F <sup>10</sup> | TTGCACTGCTTAACCATGCG     |
| qPCR1_Ec_hemN_R <sup>10</sup> | ACACGTTTCAGGGTAAAGGC     |
| qPCR1_Sa_hemQ_F <sup>10</sup> | ATGAGTCAAGCAGCCGAAAC     |
| qPCR1_Sa_hemQ_R <sup>10</sup> | TTCACTGACAAGTGCATCGC     |
| qPCR1_Sa_hemH_F <sup>10</sup> | GTTTCGGCACATAGTTTGCC     |
| qPCR1_Sa_hemH_R <sup>10</sup> | TGCCAACCAATCGCGATATG     |
| qPCR1_Sa_hemY_F <sup>10</sup> | TGCCGAAAAGTATGCCACAG     |
| qPCR1_Sa_hemY_R <sup>10</sup> | CCAACCGCTTCAAAGATGC      |
| U16SRT-F (16S) <sup>11</sup>  | ACTCCTACGGGAGGCAGCAGT    |
| U16SRT-R (16S) <sup>11</sup>  | TATTACCGCGGCTGCTGGC      |

<sup>1</sup> Replacement of *E. coli pgdH1* with *tetA-sacB* selection/counterselection cassette

<sup>2</sup> Replacement of *tetA-sacB* selection/counterselection cassette in *E. coli pgdH1* site with *S. aureus cgoX*

<sup>3</sup> Replacement of *E. coli cgdC* with *tetA-sacB* selection/counterselection cassette

<sup>4</sup> Replacement of *tetA-sacB* selection/counterselection cassette in *E. coli cgdC* site with *S. aureus chdC*

<sup>5</sup> Generation of longer integration arms for *E. coli cgdC* site (3&4 3' end, 5&6 5'end)

<sup>6</sup> Replacement of *E. coli ppfC* with *S. aureus cpfC*

<sup>7</sup> Generation of longer integration arms for *E. coli ppfC* site (3&4 3' end, 5&6 5'end)

<sup>8</sup> Amplification of KmR marker (flanked by FRT sites) from pKIKOlacZKn plasmid for replacement of *E. coli cgdH*

<sup>9</sup> Additional primers used for sequence verification of integrated DNA

<sup>10</sup> Primers used for qPCR analysis

**Supplemental Table S2.** qPCR analysis confirms gene replacements and expression. RNA was extracted and reverse transcribed from log phase and stationary phase bacteria. MC4100-YFP is the parent strain of the screen's *Sa*-CPD-YFP bacteria. cDNA was diluted 1/1000 for 16S qPCR analysis. "Ct" = cycle threshold. N=3 for 16S, all others n=1. "no Ct" = Ct > 34 cycles.

| sample             | primer set | Log phase cultures | Stationary cultures |
|--------------------|------------|--------------------|---------------------|
|                    |            | Ct                 | Ct                  |
| MC4100-YFP         | 16S        | 13.10              | 13.16               |
| <i>Sa</i> -CPD-YFP | 16S        | 13.30              | 13.43               |

|                    |       |       |       |
|--------------------|-------|-------|-------|
| MC4100-YFP         | cgdC  | 24.43 | 25.68 |
| MC4100-YFP         | chdC  | no Ct | no Ct |
| <i>Sa</i> -CPD-YFP | cgdC  | no Ct | no Ct |
| <i>Sa</i> -CPD-YFP | chdC  | 22.92 | 27.49 |
| MC4100-YFP         | pgdH1 | 21.43 | 24.82 |
| MC4100-YFP         | cgoX  | no Ct | no Ct |
| <i>Sa</i> -CPD-YFP | pgdH1 | no Ct | no Ct |
| <i>Sa</i> -CPD-YFP | cgoX  | 21.41 | 26.31 |
| MC4100-YFP         | ppfC  | 22.32 | 23.95 |
| MC4100-YFP         | cpfC  | no Ct | no Ct |
| <i>Sa</i> -CPD-YFP | ppfC  | no Ct | no Ct |
| <i>Sa</i> -CPD-YFP | cpfC  | 22.07 | 24.07 |

Supplemental Figures:

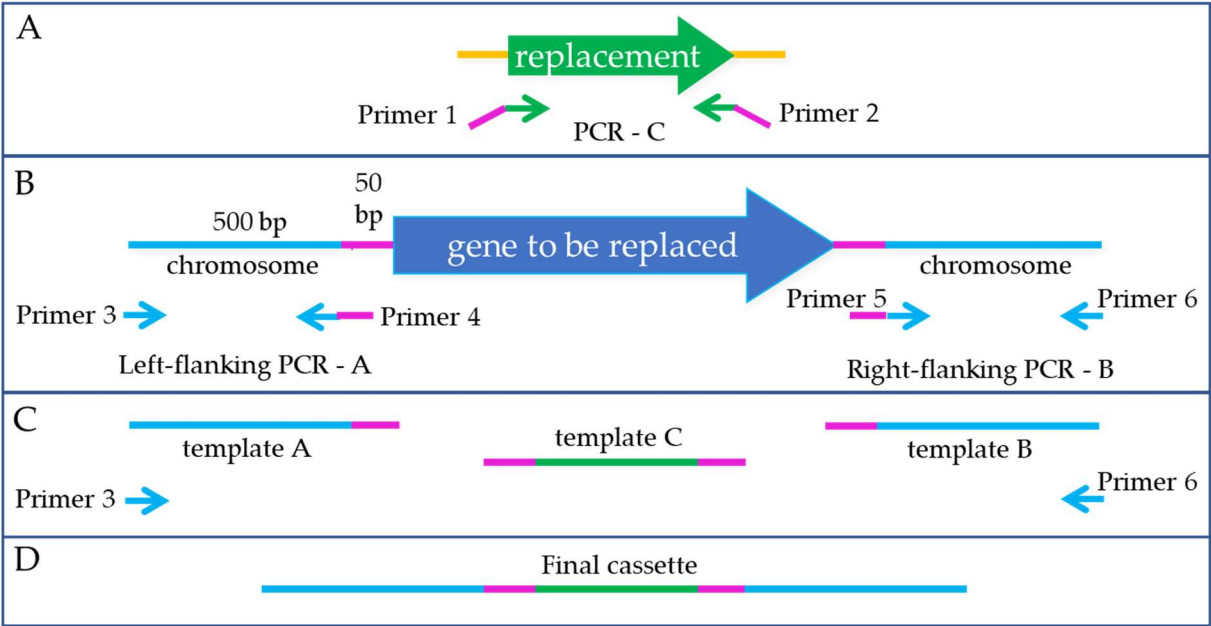

**Supplemental Figure S1.** Three part PCR Schematic: (A) PCR reaction amplifies replacement cassette, “PCR-C”; (B) additional adjacent regions of homology are also amplified, with some overlap, “PCR-A” & “PCR-B”; (C) PCR products A, B & C are combined as templates, which together with outer primers are used to amplify a replacement cassette with larger regions of homology (D).

## Supplemental Figure S2:

| <i>Sa</i> -CPD-YFP (ex/em 500/535)         |    |            |     |            |            |     |     |     |     |     |     |     |
|--------------------------------------------|----|------------|-----|------------|------------|-----|-----|-----|-----|-----|-----|-----|
|                                            | 1  | 2          | 3   | 4          | 5          | 6   | 7   | 8   | 9   | 10  | 11  | 12  |
| A                                          | 0  | 136        | 132 | 134        | 115        | 114 | 114 | 118 | 104 | 96  | 121 |     |
| B                                          | 0  | 0          | 108 | 65         | 92         | 88  | 89  | 79  | 97  | 85  | 98  | 111 |
| C                                          | 0  | 111        | 84  | 84         | 82         | 84  | 87  | 85  | 93  | 93  | 89  | 98  |
| D                                          | 0  | 102        | 83  | 2          | <b>4</b>   | 90  | 87  | 80  | 82  | 90  | 86  | 95  |
| E                                          | 0  | 90         | 88  | 80         | 15         | 42  | 78  | 81  | 85  | 89  | 86  | 101 |
| F                                          | 0  | 98         | 94  | 88         | 90         | 82  | 88  | 89  | 89  | 90  | 89  | 97  |
| G                                          | 0  | 81         | 15  | 80         | 72         | 67  | 64  | 77  | 85  | 93  | 88  | 102 |
| H                                          | 0  | 98         | 89  | 90         | 88         | 93  | 89  | 85  | 87  | 85  | 88  | 98  |
| WT-CFP (ex/em 445/475)                     |    |            |     |            |            |     |     |     |     |     |     |     |
|                                            | 1  | 2          | 3   | 4          | 5          | 6   | 7   | 8   | 9   | 10  | 11  | 12  |
| A                                          | -2 | 121        | 115 | 115        | 102        | 100 | 99  | 93  | 99  | 90  | 117 | 121 |
| B                                          | -1 | 3          | 90  | 108        | 104        | 98  | 100 | 108 | 92  | 95  | 92  | 103 |
| C                                          | 1  | 121        | 95  | 103        | 97         | 98  | 94  | 92  | 89  | 90  | 91  | 103 |
| D                                          | 0  | 104        | 98  | 105        | <b>149</b> | 101 | 97  | 95  | 105 | 89  | 92  | 96  |
| E                                          | -1 | 104        | 97  | 107        | 122        | 143 | 96  | 96  | 98  | 90  | 94  | 100 |
| F                                          | 0  | 95         | 90  | 99         | 100        | 95  | 103 | 86  | 92  | 94  | 93  | 94  |
| G                                          | 2  | <b>366</b> | 65  | 103        | 103        | 99  | 111 | 94  | 93  | 93  | 93  | 93  |
| H                                          | 0  | 92         | 91  | 90         | 90         | 89  | 95  | 91  | 96  | 94  | 96  | 91  |
| <i>Sa</i> -CPD-YFP + hemin (ex/em 500/535) |    |            |     |            |            |     |     |     |     |     |     |     |
|                                            | 1  | 2          | 3   | 4          | 5          | 6   | 7   | 8   | 9   | 10  | 11  | 12  |
| A                                          | 0  | 90         | 91  | 90         | 88         | 92  | 94  | 100 | 100 | -2  | 99  | 91  |
| B                                          | 0  | 1          | 90  | 74         | 101        | 88  | 87  | 118 | 96  | 53  | 102 | 88  |
| C                                          | 0  | 100        | 89  | 86         | 85         | 101 | 110 | 117 | 112 | 92  | 104 | 105 |
| D                                          | 0  | 98         | 90  | 5          | <b>70</b>  | 99  | 96  | 92  | 92  | 99  | 98  | 104 |
| E                                          | 0  | 98         | 87  | <b>174</b> | 7          | 53  | 97  | 100 | 102 | 92  | 91  | 104 |
| F                                          | 0  | 92         | 111 | 81         | 71         | 82  | 91  | 104 | 88  | 91  | 88  | 103 |
| G                                          | 0  | 109        | 29  | 78         | 68         | 70  | 85  | 114 | 99  | 98  | 92  | 98  |
| H                                          | 0  | 99         | 100 | 99         | 92         | 92  | 96  | 87  | 104 | 92  | 98  | 107 |
| WT-CFP + hemin (ex/em 445/475)             |    |            |     |            |            |     |     |     |     |     |     |     |
|                                            | 1  | 2          | 3   | 4          | 5          | 6   | 7   | 8   | 9   | 10  | 11  | 12  |
| A                                          | 0  | 93         | 98  | 97         | 94         | 96  | 92  | 103 | 91  | -11 | 102 | 101 |
| B                                          | -1 | 2          | 95  | 92         | 102        | 102 | 96  | 99  | 95  | 57  | 98  | 95  |
| C                                          | 0  | 103        | 100 | 98         | 95         | 104 | 91  | 106 | 105 | 90  | 98  | 104 |
| D                                          | -1 | 96         | 98  | 136        | <b>99</b>  | 105 | 108 | 112 | 103 | 92  | 97  | 102 |
| E                                          | 1  | 108        | 94  | 127        | <b>149</b> | 142 | 96  | 103 | 106 | 97  | 96  | 98  |
| F                                          | 0  | 100        | 96  | 97         | 94         | 89  | 87  | 95  | 104 | 91  | 93  | 97  |
| G                                          | 1  | 128        | 83  | 92         | 98         | 101 | 94  | 115 | 102 | 99  | 98  | 100 |
| H                                          | 0  | 107        | 99  | 91         | 90         | 93  | 90  | 87  | 98  | 95  | 101 | 103 |

**Supplemental Figure S2.** Example microplate readings expressed as percent of control, in YFP and CFP channels for duplicate plates +/- hemin. Column 1 blanks have been subtracted, and well readings have been normalized to vehicle control wells (column 12). Well 5D is a screen hit, butylcycloheptylprodiginine. Well 5D showed selective inhibition in the *Sa*-CPD-YFP that was rescued upon addition of heme. The amount of WT-CFP bacteria was increased when growth of *Sa*-CPD-YFP was inhibited.

| Plate Legend                                                  |       |                             |                             |                             |                             |                             |                                             |                                             |                                             |                                             |                                             |                    |
|---------------------------------------------------------------|-------|-----------------------------|-----------------------------|-----------------------------|-----------------------------|-----------------------------|---------------------------------------------|---------------------------------------------|---------------------------------------------|---------------------------------------------|---------------------------------------------|--------------------|
|                                                               | 1     | 2                           | 3                           | 4                           | 5                           | 6                           | 7                                           | 8                                           | 9                                           | 10                                          | 11                                          | 12                 |
| A                                                             | media | <i>Sa</i> -CPD-YFP + WT-CFP + spectinomycin | <i>Sa</i> -CPD-YFP |
| B                                                             | media | <i>Sa</i> -CPD-YFP + WT-CFP + spectinomycin | <i>Sa</i> -CPD-YFP |
| C                                                             | media | <i>Sa</i> -CPD-YFP + WT-CFP + spectinomycin | <i>Sa</i> -CPD-YFP |
| D                                                             | media | <i>Sa</i> -CPD-YFP + WT-CFP + spectinomycin | <i>Sa</i> -CPD-YFP |
| E                                                             | media | <i>Sa</i> -CPD-YFP + WT-CFP + spectinomycin | WT-CFP             |
| F                                                             | media | <i>Sa</i> -CPD-YFP + WT-CFP + spectinomycin | WT-CFP             |
| G                                                             | media | <i>Sa</i> -CPD-YFP + WT-CFP + spectinomycin | WT-CFP             |
| H                                                             | media | <i>Sa</i> -CPD-YFP + WT-CFP + spectinomycin | WT-CFP             |
| <i>Sa</i> -CPD-YFP (YFP channel, excitation 500 emission 535) |       |                             |                             |                             |                             |                             |                                             | Z' Factor: 0.76                             |                                             |                                             |                                             |                    |
|                                                               | 1     | 2                           | 3                           | 4                           | 5                           | 6                           | 7                                           | 8                                           | 9                                           | 10                                          | 11                                          | 12                 |
| A                                                             | -12   | 8340                        | 8304                        | 7779                        | 7647                        | 7585                        | 454                                         | 294                                         | 268                                         | 958                                         | 732                                         | 20448              |
| B                                                             | 14    | 7206                        | 7644                        | 7242                        | 7257                        | 7134                        | 622                                         | 750                                         | 733                                         | 743                                         | 720                                         | 18044              |
| C                                                             | 0     | 7526                        | 7237                        | 7233                        | 7268                        | 7360                        | 633                                         | 352                                         | 526                                         | 745                                         | 666                                         | 18104              |
| D                                                             | 3     | 7114                        | 7385                        | 7523                        | 7594                        | 7170                        | 826                                         | 541                                         | 455                                         | 741                                         | 359                                         | 19248              |
| E                                                             | 0     | 7195                        | 7138                        | 7760                        | 7669                        | 7797                        | 818                                         | 869                                         | 541                                         | 855                                         | 532                                         | 242                |
| F                                                             | -8    | 7033                        | 7203                        | 6609                        | 7238                        | 7179                        | 651                                         | 844                                         | 790                                         | 865                                         | 453                                         | 232                |
| G                                                             | -2    | 7522                        | 7047                        | 7328                        | 7753                        | 7720                        | 978                                         | 797                                         | 458                                         | 869                                         | 740                                         | 225                |
| H                                                             | 6     | 7747                        | 7745                        | 7539                        | 7793                        | 7650                        | 882                                         | 269                                         | 518                                         | 885                                         | 405                                         | 219                |
| WT-CFP (CFP channel, excitation 445 emission 475)             |       |                             |                             |                             |                             |                             |                                             | Z' Factor: 0.79                             |                                             |                                             |                                             |                    |
|                                                               | 1     | 2                           | 3                           | 4                           | 5                           | 6                           | 7                                           | 8                                           | 9                                           | 10                                          | 11                                          | 12                 |
| A                                                             | -20   | 4089                        | 3490                        | 3371                        | 3354                        | 3373                        | 279                                         | 317                                         | 316                                         | 234                                         | 264                                         | -92                |
| B                                                             | 1     | 3474                        | 3358                        | 3407                        | 3223                        | 3276                        | 308                                         | 191                                         | 205                                         | 226                                         | 208                                         | -157               |
| C                                                             | 4     | 3340                        | 3403                        | 3289                        | 3255                        | 3233                        | 276                                         | 386                                         | 295                                         | 230                                         | 231                                         | -129               |
| D                                                             | 30    | 3429                        | 3195                        | 3189                        | 3315                        | 3288                        | 183                                         | 319                                         | 330                                         | 187                                         | 343                                         | -137               |
| E                                                             | -22   | 3355                        | 3261                        | 3178                        | 3256                        | 3191                        | 206                                         | 210                                         | 322                                         | 193                                         | 316                                         | 7922               |
| F                                                             | 7     | 3355                        | 3254                        | 3382                        | 3193                        | 3339                        | 308                                         | 229                                         | 261                                         | 250                                         | 377                                         | 8325               |
| G                                                             | -15   | 3224                        | 3278                        | 3269                        | 3181                        | 3145                        | 202                                         | 208                                         | 337                                         | 317                                         | 237                                         | 8090               |
| H                                                             | 18    | 3403                        | 3347                        | 3321                        | 3262                        | 3165                        | 236                                         | 367                                         | 378                                         | 276                                         | 397                                         | 8201               |

**Supplemental Figure S3.** Microplate fluorescence readings for an experiment calculating Z' Factors, under screen conditions, are shown for both the YFP and CFP channels. Media only control readings have been subtracted. A graphical Legend illustrating plate contents is shown at the top. Media only controls are found in column 1. Control wells containing only *Sa*-CPD-YFP bacteria are in column 12 rows A-D, control wells containing WT-CFP bacteria are in column 12 rows E-H. All other wells contain a mixture of *Sa*-CPD-YFP and WT-CFP bacteria. 50 µg/mL spectinomycin has been added to wells in columns 7-11.

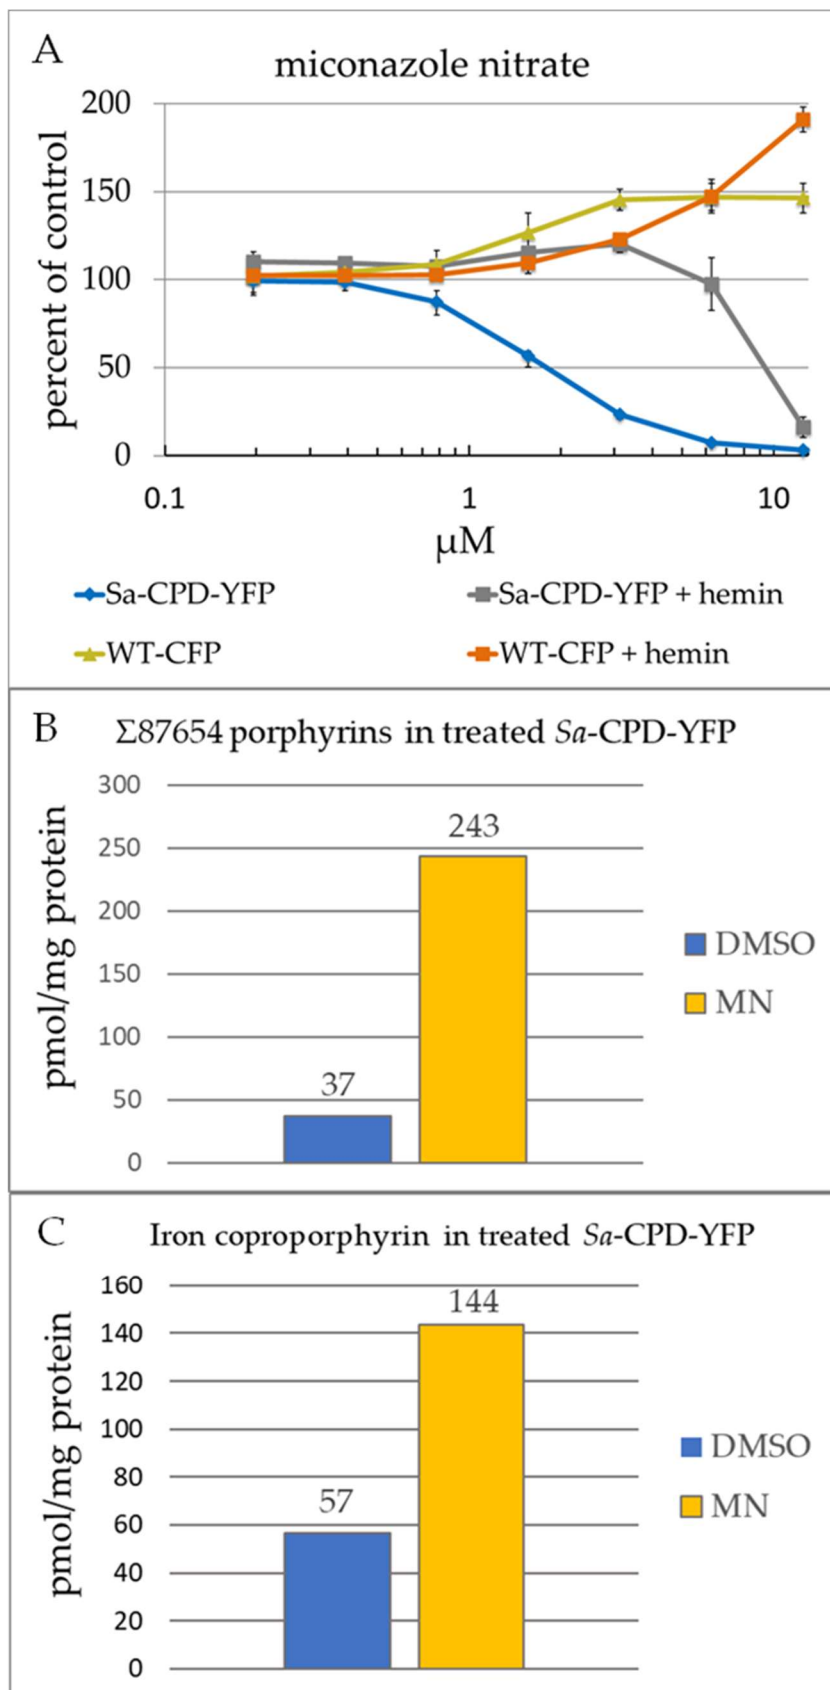

**Supplemental Figure S4.** (A) Serial dilutions of miconazole nitrate were used to treat mixtures of *Sa*-CPD-YFP and WT-CFP bacteria, either in the absence or presence of hemin, using assay conditions similar to those in the pilot screen. Cultures were measured at 16 hours in both YFP (*Sa*-CPD-YFP) and CFP (WT-CFP) channels. UPLC analysis was used to measure total intermediate porphyrins with 8, 7, 6, 5 & 4 carboxyl groups ( $\Sigma 87654$ )(B) and iron coproporphyrin (C) in cell pellets from treated *Sa*-CPD-YFP bacteria. Bacteria were grown at 29 °C until O.D.<sub>600</sub> of 0.2, compounds were added at 6  $\mu$ M and incubated for an additional 3 hours. Cells were then pelleted and washed. Porphyrins were then extracted and subjected to UPLC analysis. Preliminary analysis shows accumulation of Iron Coproporphyrin in miconazole nitrate treated *Sa*-CPD-YFP bacteria and suggests that ChdC may be inhibited in these assays. For porphyrin analysis, each sample was assayed in triplicate, sample n = 1

### *Sa*-CPD-YFP grown in competition with WT-CFP

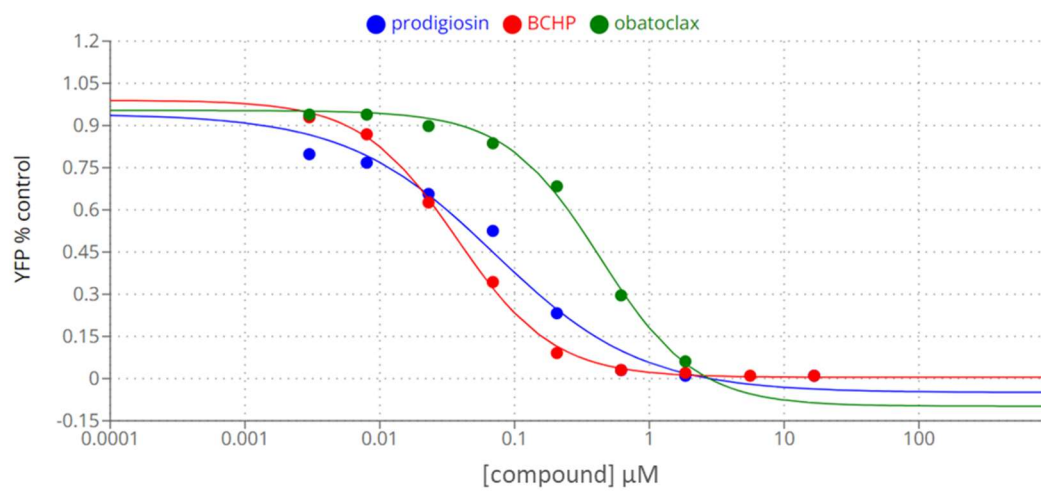

#### $\text{IC}_{50}$ Regression Results

**Supplemental Figure S5.** Fits to determine  $\text{IC}_{50}$ s. Mixed cultures of *Sa*-CPD-YFP and WT-CFP were cultured in the presence of prodigiosin, BHP or obatoclax under standard screen conditions. Normalized readings from *Sa*-CPD-YFP (YFP channel) at 18 hours were plotted and  $\text{IC}_{50}$ s calculated using an online tool: Quest Graph  $\text{IC}_{50}$  Calculator. Data was plotted using four parameter mode, smallest response subtracted from background correction, and divided by largest response for normalization. This analysis yielded the following  $\text{IC}_{50}$ s: BHP 37.4 nM, prodigiosin 70.4 nM, and obatoclax 434.6 nM. Each point on the graph is the average of four technical replicates.



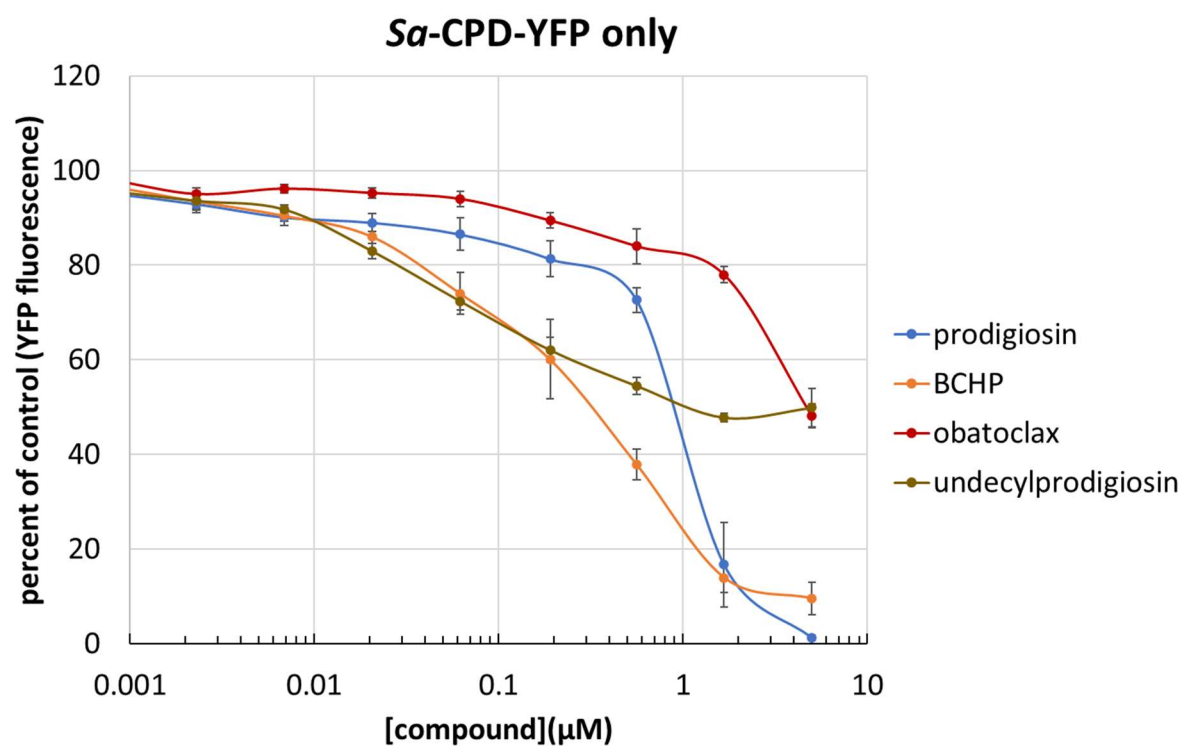

**Supplemental Figure S6:** A version of the screen viability assay was performed with *Sa*-CPD-YFP only (no WT-CFP). *Sa*-CPD-YFP was incubated with compound for 18 hours and *Sa*-CPD-YFP was measured in the YFP channel (excitation 500, emission 535 nm).

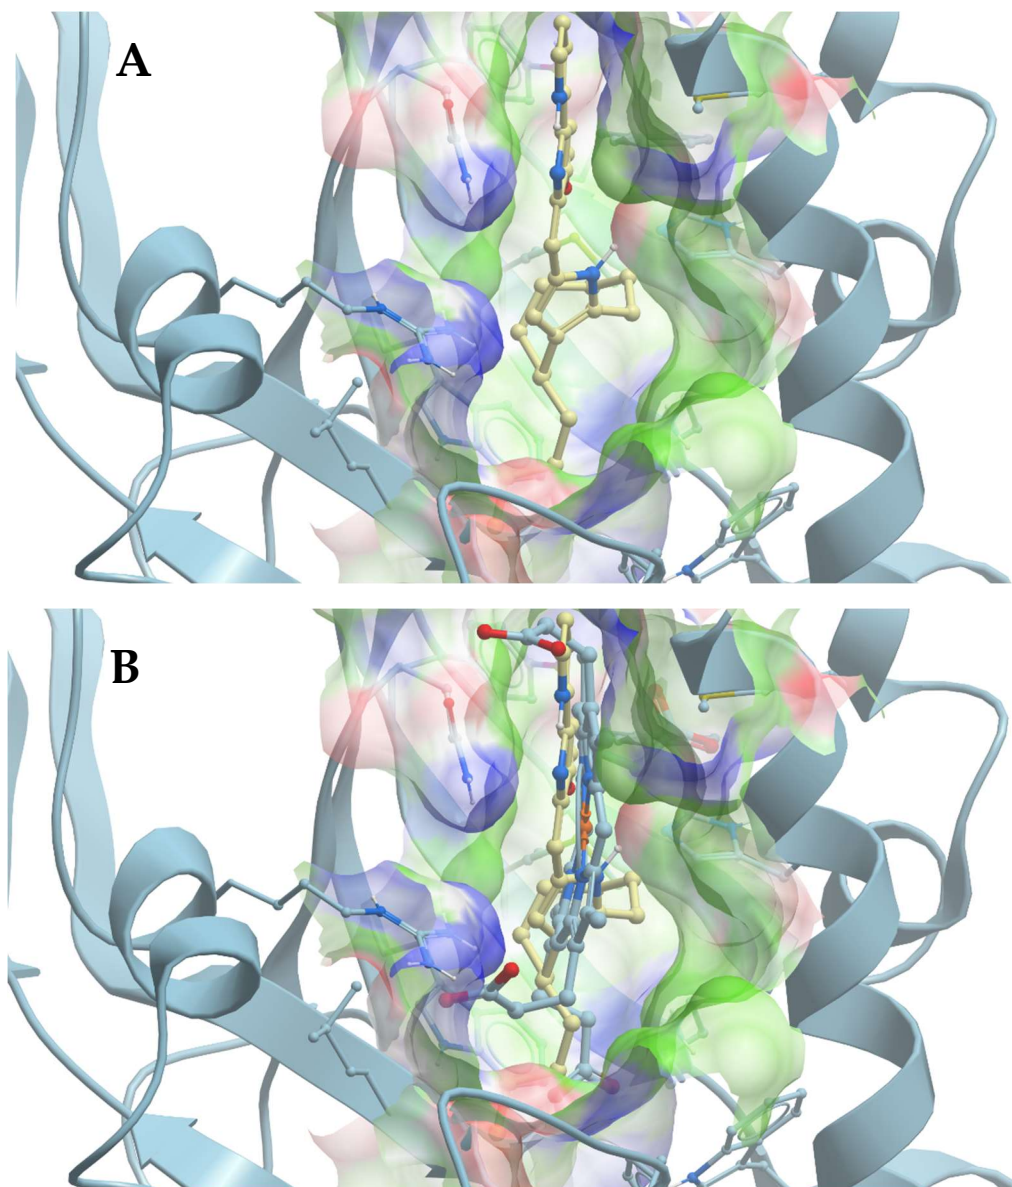

**Supplemental Figure S7.** Results of *in silico* docking of BChP with LmChdC. (A) Docked BChP is shown in the center of this figure as a thick ball and stick model (carbon yellow, oxygen red, nitrogen blue). The surrounding ligand binding pocket surface is colored by binding property (hydrophobic areas green, hydrogen bond acceptors red, and hydrogen bond donors blue). Protein is depicted by ribbon, nearby amino acid residue side chains are shown as thin ball and stick (carbons light blue) underneath the surface. (B) As in A, but coproheme (carbons light blue, thick ball and stick, Fe orange) from coproheme-LmChdC structure PDB ID: 5LOQ is shown superimposed with BChP.
